# Supplementary figures and images for: Induced Chromosomal Aneuploidy Results in Global and Consistent Deregulation of the Transcriptome of Cancer Cells
Source: PubMed Central journal article supplement — Neoplasia. 2019 Jun 4;21(7):721–9. doi: 10.1016/j.neo.2019.04.009 (PMC6551473; doi:10.1016/j.neo.2019.04.009), 2019-06-04

A

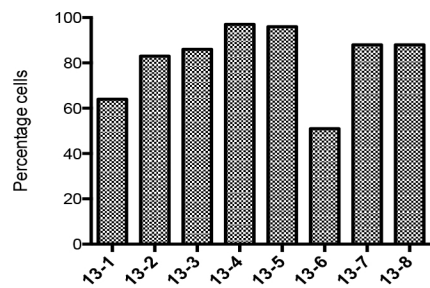

B

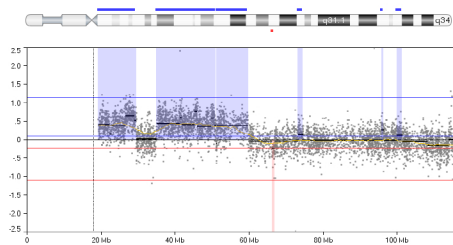

C

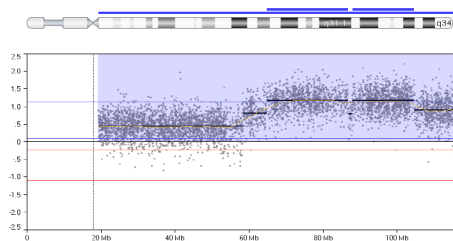

D

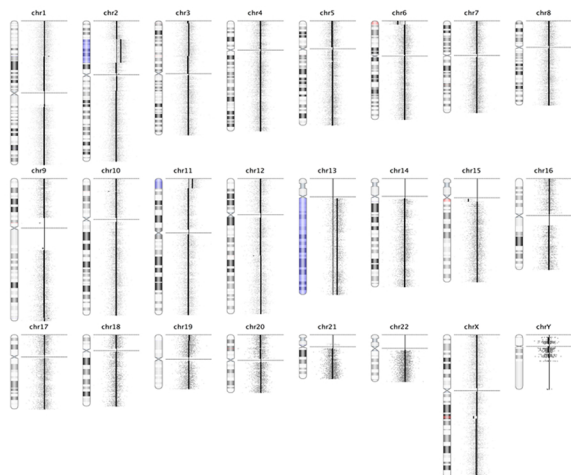

E

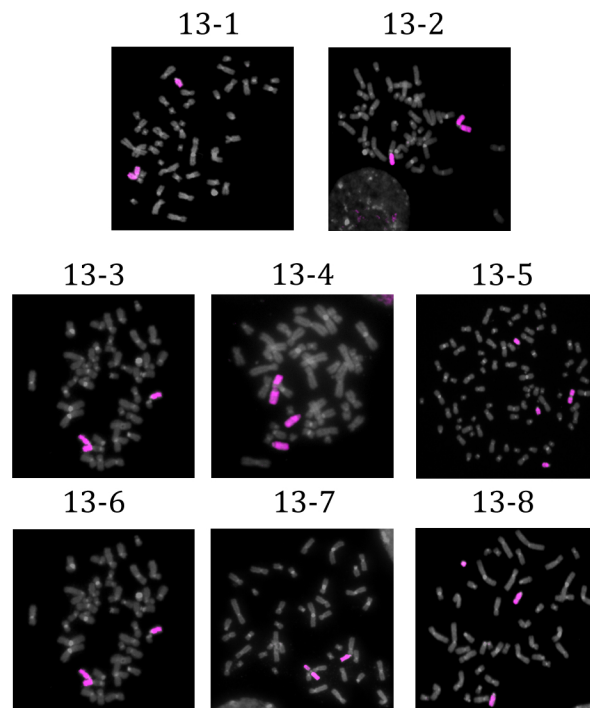

F

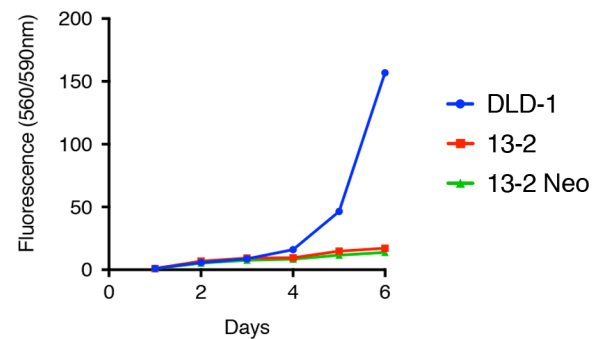

G

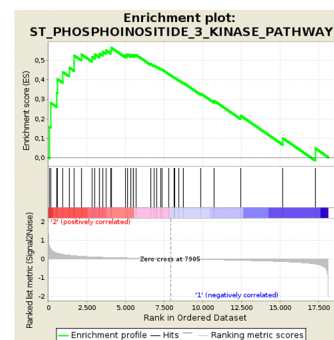

Supplement: mmc1.pdf [file mmc1.pdf]

**A**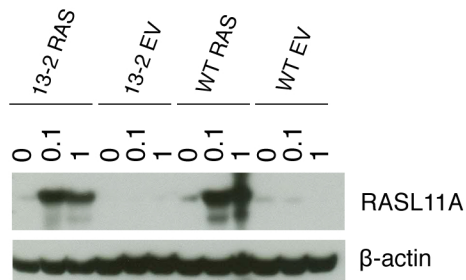**B**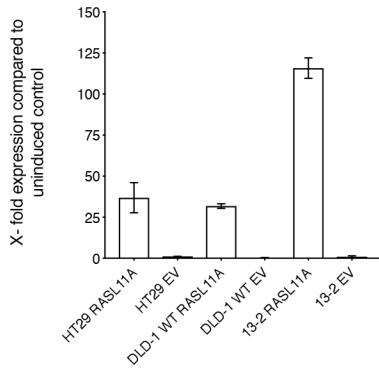**C**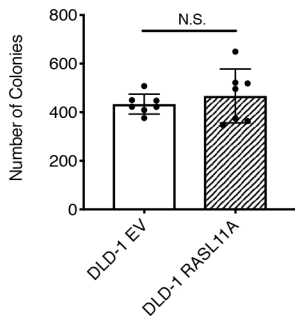**D**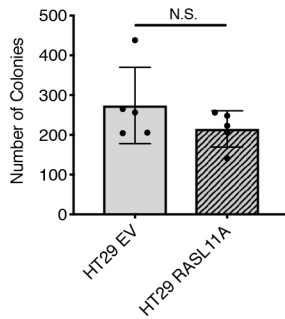**E**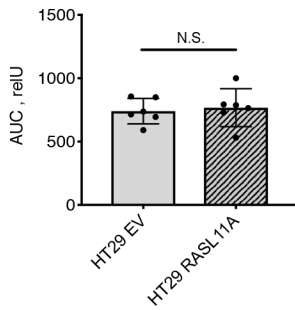

Supplement: mmc2.pdf [file mmc2.pdf]
